# Supplementary material for: Ancient Danish Apple Cultivars—A Comprehensive Metabolite and Sensory Profiling of Apple Juices
Source: PubMed Central journal article supplement (PMC6680383; doi:10.3390/metabo9070139), 2019-07-11
Supplement: metabolites-09-00139-s001.pdf [file metabolites-09-00139-s001.pdf]

# Supplementary Material

## Ancient Danish apple cultivars – A comprehensive metabolite and sensory profiling of apple juices

**Nunzia Iaccarino**<sup>1</sup>, **Camilla Varming**<sup>2</sup>, **Mikael Agerlin Petersen**<sup>3</sup>, **Nanna Viereck**<sup>3</sup>, **Birk Schütz**<sup>4</sup>, **Torben Bo Toldam-Andersen**<sup>5</sup>, **Antonio Randazzo**<sup>1</sup>, and **Søren Balling Engelsen**<sup>3,\*</sup>

<sup>1</sup> Department of Pharmacy, University of Naples Federico II, Via D. Montesano 49, 80131 Naples, Italy; nunzia.iaccarino@unina.it

<sup>2</sup> Novozymes, Biologiens Vej 2, 2800 Kgs. Lyngby, Denmark

<sup>3</sup> Department of Food Science, University of Copenhagen, Rolighedsvej 26, 1958 Frederiksberg C, Denmark

<sup>4</sup> Bruker BioSpin, Silberstreifen 4, 76287 Rheinstetten, Germany

<sup>5</sup> Department of Plant and Environmental Sciences, University of Copenhagen, Højbakkegaard Alle 13, 2630 Taastrup, Denmark

\* Correspondence: se@food.ku.dk; Tel.: +45 20 20 00 64 (S.B.E.)

## Table of Contents

| No. | Content                                                                                                                                                                                                                                                                                                                                                                                              | Page |
|-----|------------------------------------------------------------------------------------------------------------------------------------------------------------------------------------------------------------------------------------------------------------------------------------------------------------------------------------------------------------------------------------------------------|------|
| 1   | <b>Analytical platforms' reliability</b>                                                                                                                                                                                                                                                                                                                                                             | S3   |
| 2   | <b>Table S1.</b> °Brix values of the 86 juices.                                                                                                                                                                                                                                                                                                                                                      | S5   |
| 3   | <b>Table S2.</b> List of 65 compounds identified by GC-MS analysis.                                                                                                                                                                                                                                                                                                                                  | S7   |
| 4   | <b>Table S3.</b> Distinct odors and flavors of the 86 juices and numerical evaluation of their sensory attributes.                                                                                                                                                                                                                                                                                   | S9   |
| 5   | <b>Table S4.</b> Average concentrations of the compounds and parameters identified from Bruker SGF profiling.                                                                                                                                                                                                                                                                                        | S11  |
| 6   | <b>Figure S1.</b> Signal assignment of a representative <sup>1</sup> H-NMR spectrum of apple juice (0 – 5.5 ppm).                                                                                                                                                                                                                                                                                    | S12  |
| 7   | <b>Figure S2.</b> Correlation map generated from the 86 x 96 matrix. The variables are grouped by similarity.                                                                                                                                                                                                                                                                                        | S13  |
| 8   | <b>Figure S3.</b> (A) LV1/LV2 scores plot of the PLS-DA model developed to discriminate early-season juices (class 1) from late (class 2) harvest cultivars. Most discriminative markers are shown in the regression vector plot (C) and VIP score plot (D). Area Under the Curve (AUC) of Receiver Operating Characteristic (ROC) (E) and sensitivity and specificity (F) plot of the PLS-DA model. | S14  |

## Analytical platforms' reliability

### NMR

This study focuses on the employment of a recently developed NMR-based juice screener (SGF profiling) for the analysis of juices obtained by ancient Danish apple cultivars. It is known that two NMR determinations give the same results (large metabolomic studies usually employ single determination); this is why only one measurement was performed in this work. Even though two independent preparations of the juices would have better described the intra-juice variability, our study was more oriented toward describing the inter-apple juice variability rather than describing each apple cultivar in detail.

### Ion Chromatography (IC)

To measure IC accuracy, a Quality Control sample was prepared by mixing five standards (citric acid, malic acid, glucose, fructose and sucrose) and it was run seven times. The areas under the peak corresponding to each molecule together with their standard deviation, average and percent coefficient of variation (%CV) across the seven replicates, are reported in the table below. The reported values of %CV (less than 2%) confirm the reliability of the IC platform employed in our study.

|                           | Citric acid | Malic acid | Glucose  | Fructose | Sucrose  |
|---------------------------|-------------|------------|----------|----------|----------|
| Standard mix_1            | 10.619      | 41.143     | 7028.728 | 11763.45 | 3505.707 |
| Standard mix_2            | 10.484      | 41.032     | 6976.936 | 11575.77 | 3493.564 |
| Standard mix_3            | 10.669      | 41.35      | 7028.266 | 11603.51 | 3578.934 |
| Standard mix_4            | 10.544      | 41.296     | 7017.829 | 11575.37 | 3598.164 |
| Standard mix_5            | 10.284      | 40.249     | 6759.458 | 11312.84 | 3451.197 |
| Standard mix_6            | 10.362      | 40.278     | 6767.272 | 11318.27 | 3454.808 |
| Standard mix_7            | 10.358      | 40.279     | 6751.946 | 11307.38 | 3439.516 |
| <i>STANDARD DEVIATION</i> | 0.1449997   | 0.5111117  | 136.6152 | 180.9388 | 63.18577 |
| <i>AVERAGE</i>            | 10.474286   | 40.803857  | 6904.348 | 11493.8  | 3503.127 |
| <i>CV<sup>a</sup></i>     | 0.0138434   | 0.0125261  | 0.019787 | 0.015742 | 0.018037 |
| <i>%CV</i>                | 1.38        | 1.25       | 1.98     | 1.57     | 1.80     |

<sup>a</sup>CV = Coefficient of Variation calculated on the 7 replicates.

### Gas Chromatography/Mass Spectrometry (GC-MS)

The accuracy of the analysis of aroma compounds by dynamic headspace GC-MS was already tested in our laboratory on a different apple juice dataset consisting of seventeen samples analyzed in quadruplicate. The %CV for each aroma compound, across the four replicates, is reported in table below. For most compounds, the %CV was between 0.2 and 15%. For few compounds the values were higher, mainly due the compounds being present in very small concentrations.

| <b>Aroma compound</b>    | <b>%CV<sup>a</sup></b> |
|--------------------------|------------------------|
| <i>Alcohols</i>          |                        |
| 2-methyl-1-butanol       | 0.2                    |
| 2-methyl-1-propanol      | 0.5                    |
| 2-ethyl-1-hexanol        | 4.2                    |
| 2-hexen-1-ol             | 1.3                    |
| 3-methyl-3-butenol       | 4.9                    |
| cis-3-hexenol            | 5.4                    |
| 6-Methyl-5-hepten-2-ol   | 6.3                    |
| heptanol                 | 1.5                    |
| hexanol                  | 0.2                    |
| octanol                  | 1.3                    |
| propanol                 | 0.7                    |
| butanol                  | 0.2                    |
| <i>Esters</i>            |                        |
| 2-methylbutyl acetate    | 0.8                    |
| 2-methylpropyl acetate   | 3.3                    |
| hexyl acetate            | 0.7                    |
| pentyl acetate           | 2.3                    |
| propyl acetate           | 2.7                    |
| ethyl acetate            | 55.0                   |
| butyl acetate            | 0.5                    |
| methyl acetate           | 46.5                   |
| propyl 2-methylbutanoate | 2.1                    |
| butyl butanoate          | 0.9                    |
| hexyl butanoate          | 2.3                    |
| methyl 2-methylbutanoate | 3.8                    |
| butyl 2-methyl butanoate | 1.6                    |
| propyl butanoate         | 1.0                    |
| butyl propanoate         | 2.7                    |
| ethyl 2-methylpropanoate | 3.7                    |
| ethyl 2-methylbutyrate   | 0.7                    |
| ethyl butyrate           | 0.3                    |
| hexyl-2-methyl butyrate  | 2.7                    |
| methyl butyrate          | 3.6                    |
| methyl hexanoate         | 16.6                   |
| ethyl hexanoate          | 0.9                    |
| butyl hexanoate          | 3.6                    |
| ethyl pentanoate         | 3.3                    |
| ethyl propanoate         | 32.0                   |
| ethyl octanoate          | 14.3                   |
| <i>Aldehydes</i>         |                        |
| butanal                  | 71.4                   |
| heptanal                 | 5.2                    |
| hexanal                  | 0.3                    |
| nonanal                  | 2.8                    |
| octanal                  | 6.3                    |
| t-2-hexenal              | 2.0                    |
| <i>Ketons</i>            |                        |
| 2-butanone               | 38.8                   |
| 2-heptanone              | 16.0                   |
| <i>Terpenes</i>          |                        |
| farnesene                | 9.3                    |

<sup>a</sup>%CV = Percentage coefficient of variation calculated on 4 replicates.

**Table S1.** °Brix values of the 86 juices.

| #  | Apple cultivar          | °Brix |
|----|-------------------------|-------|
| 1  | Louisendal              | 9.7   |
| 2  | Skovfoged               | 10.6  |
| 3  | Ferskenrødt sommeræble  | 11.1  |
| 4  | Ejby æble               | 10.2  |
| 5  | Augustæble              | 9.00  |
| 6  | Uggerløse æble          | 10.3  |
| 7  | Herschendsgave          | 12.3  |
| 8  | Gadeskovæblet           | 10.8  |
| 9  | Auroravej               | 12.1  |
| 10 | Ondrup sommeræble       | 12.8  |
| 11 | Fåborgæble              | 12.6  |
| 12 | Kundbyæble              | 9.4   |
| 13 | Ingers æble             | 10.0  |
| 14 | Ørdings æble            | 10.4  |
| 15 | Ulderup æble            | 10.4  |
| 16 | Thyregod kalvil         | 10.5  |
| 17 | Fuhræble                | 11.0  |
| 18 | Guldspir                | 10.3  |
| 19 | Gravenfin               | 11.9  |
| 20 | Sofie æble              | 9.5   |
| 21 | Nina's æble             | 11.2  |
| 22 | Søde æbler fra Aalsrode | 8.0   |
| 23 | Vallekilde Sommeræble   | 10.5  |
| 24 | Rosenholm               | 12.0  |
| 25 | Dynnegårdsæble          | 11.2  |
| 26 | Nonnetit Bastard        | 13.2  |
| 27 | Miang æble              | 10.5  |
| 28 | Gråsten Gul             | 11.6  |
| 29 | Pigeon Stribet          | 11.8  |
| 30 | Butteræble              | 12.3  |
| 31 | Vejlææble               | 11.9  |
| 32 | Nybøllegård             | 11.4  |
| 33 | Fej ø æble              | 12.0  |
| 34 | Hindbæræble             | 10.1  |
| 35 | Pilehavesæble           | 13.2  |
| 36 | Langt rødt Hinbæræble   | 11.6  |
| 37 | Mosedede æbler          | 11.6  |
| 38 | Ingrid Marie            | 11.8  |
| 39 | Maglemer rød            | 9.2   |
| 40 | Fynsk udvalg V          | 9.0   |
| 41 | Lundbytorp æble         | 11.6  |
| 42 | Bodil Neergård          | 13.5  |
| 43 | Filippa Harritslev      | 11.3  |
| 44 | Tønnes                  | 12.2  |
| 45 | Flaskehalsen            | 12.6  |
| 46 | Flintinge               | 11.9  |
| 47 | Jakober                 | 11.6  |
| 48 | Æbletoftæble            | 10.8  |
| 49 | Skenkelsø æble          | 13.3  |
| 50 | Broholm Rosenæble       | 13.5  |
| 51 | Ondrup moseæble         | 11.3  |
| 52 | Høje Taastrup æble      | 9.8   |
| 53 | Knud Lunn               | 11.5  |
| 54 | Niels Juul              | 11.8  |
| 55 | Thyrislund              | 10.6  |
| 56 | Broholm                 | 11.8  |
| 57 | Skensved æble           | 8.1   |
| 58 | Pigeon spejlsby         | 11.2  |
| 59 | Borgherre               | 12.7  |
| 60 | Mathilde æble           | 10.9  |
| 61 | Jølbyæble               | 9.0   |
| 62 | Gråsten Rød             | 12.2  |

|    |                       |      |
|----|-----------------------|------|
| 63 | Holstenhus            | 13.9 |
| 64 | Nonnetit fra Als      | 12.3 |
| 65 | Pigeon Rød Vinter     | 11.8 |
| 66 | Pigeon fra Maribo     | 11.3 |
| 67 | Alsisk Citronæble     | 12.3 |
| 68 | Antonius              | 14.2 |
| 69 | Fynsk udvalg II       | 11.9 |
| 70 | Annas æble            | 10.5 |
| 71 | Bedstefars æble       | 12.7 |
| 72 | Elstar                | 11.8 |
| 73 | Arreskov              | 11.1 |
| 74 | Gråsten Høvdinggård   | 12.0 |
| 75 | Barritskov madæble    | 12.1 |
| 76 | Gråmølles æble        | 11.9 |
| 77 | Farum æble            | 10.7 |
| 78 | Ildrød Pigeon         | 12.7 |
| 79 | Dronning Louise       | 13.5 |
| 80 | Risskov Rambour       | 10.8 |
| 81 | Tagesminde æble       | 10.5 |
| 82 | Apple 207 Knuthenborg | 11.2 |
| 83 | Mormors æble          | 13.1 |
| 84 | Mølleskov             | 12.3 |
| 85 | Herfølge voksæble     | 10.7 |
| 86 | Lise Legind           | 11.0 |

---

**Table S2.** List of 65 compounds identified by GC-MS analysis.

| <b>Aroma compound</b>    | <b>Mean<sup>a</sup></b> | <b>%CV</b> | <b>Min</b> | <b>Max</b> | <b>Range</b> |
|--------------------------|-------------------------|------------|------------|------------|--------------|
| <i>Alcohols</i>          |                         |            |            |            |              |
| 2-methyl-1-butanol       | 0.0340                  | 93         | 0.0000     | 0.1397     | 0.1397       |
| 3-methyl-1-butanol       | 0.0822                  | 84         | 0.0066     | 0.3414     | 0.3347       |
| 2-methyl-1-propanol      | 0.2183                  | 58         | 0.0317     | 0.6942     | 0.6626       |
| 2-butanol                | 0.0031                  | 85         | 0.0005     | 0.0162     | 0.0157       |
| 2-ethyl-1-hexanol        | 0.0036                  | 198        | 0.0005     | 0.0597     | 0.0592       |
| 2-heptanol               | 0.0004                  | 154        | 0.0000     | 0.0027     | 0.0027       |
| 2-hexen-1-ol             | 0.0799                  | 100        | 0.0029     | 0.3339     | 0.3310       |
| 2-pentanol               | 0.0007                  | 206        | 0.0000     | 0.0091     | 0.0091       |
| 3-methyl-3-butenol       | 0.0007                  | 123        | 0.0000     | 0.0046     | 0.0046       |
| 3-octanol                | 0.0156                  | 119        | 0.0000     | 0.0876     | 0.0876       |
| cis-3-hexenol            | 0.0113                  | 122        | 0.0003     | 0.0784     | 0.0781       |
| 6-Methyl-5-hepten-2-ol   | 0.0117                  | 124        | 0.0000     | 0.0907     | 0.0907       |
| heptanol                 | 0.0094                  | 111        | 0.0000     | 0.0774     | 0.0774       |
| hexanol                  | 0.0017                  | 101        | 0.0000     | 0.0075     | 0.0075       |
| linalool                 | 0.0011                  | 280        | 0.0000     | 0.0284     | 0.0284       |
| octanol                  | 0.0080                  | 258        | 0.0004     | 0.1860     | 0.1856       |
| propanol                 | 0.0126                  | 101        | 0.0006     | 0.0740     | 0.0734       |
| butanol                  | 1.5807                  | 49         | 0.1058     | 3.7960     | 3.6902       |
| <i>Esters</i>            |                         |            |            |            |              |
| 2-methylbutyl acetate    | 0.0066                  | 187        | 0.0000     | 0.0541     | 0.0541       |
| 2-methylpropyl acetate   | 0.0869                  | 193        | 0.0000     | 0.9989     | 0.9989       |
| hexyl acetate            | 0.2970                  | 173        | 0.0039     | 1.9643     | 1.9604       |
| pentyl acetate           | 0.0710                  | 197        | 0.0000     | 0.5813     | 0.5813       |
| propyl acetate           | 0.0266                  | 210        | 0.0000     | 0.4178     | 0.4178       |
| ethyl acetate            | 0.2693                  | 174        | 0.0015     | 1.9708     | 1.9692       |
| butyl acetate            | 1.1010                  | 168        | 0.0066     | 7.2872     | 7.2805       |
| methyl acetate           | 0.0040                  | 240        | 0.0000     | 0.0554     | 0.0554       |
| propyl 2-methylbutanoate | 0.0079                  | 231        | 0.0000     | 0.1185     | 0.1185       |
| 2-methylpropylbutanoate  | 0.0036                  | 113        | 0.0000     | 0.0155     | 0.0155       |
| butyl butanoate          | 0.1867                  | 110        | 0.0006     | 1.0776     | 1.0770       |
| hexyl butanoate          | 0.1175                  | 120        | 0.0000     | 0.6402     | 0.6402       |
| methyl 2-methylbutanoate | 0.0018                  | 216        | 0.0000     | 0.0246     | 0.0246       |
| butyl 2-methyl butanoate | 0.0013                  | 118        | 0.0000     | 0.0090     | 0.0090       |
| propyl butanoate         | 0.0945                  | 142        | 0.0000     | 0.6770     | 0.6770       |
| butyl propanoate         | 0.0002                  | 198        | 0.0000     | 0.0032     | 0.0032       |
| ethyl 2-methylpropanoate | 0.0013                  | 259        | 0.0000     | 0.0169     | 0.0169       |
| methyl propanoate        | 0.0019                  | 268        | 0.0000     | 0.0431     | 0.0431       |
| ethyl 2-methylbutyrate   | 0.0754                  | 219        | 0.0000     | 0.8310     | 0.8310       |
| ethyl butyrate           | 0.4822                  | 172        | 0.0000     | 3.9019     | 3.9019       |
| hexyl-2-methyl butyrate  | 0.0336                  | 125        | 0.0000     | 0.2583     | 0.2583       |
| methyl butyrate          | 0.0721                  | 160        | 0.0000     | 0.5141     | 0.5141       |
| methyl hexanoate         | 0.0005                  | 259        | 0.0000     | 0.0088     | 0.0088       |
| ethyl hexanoate          | 0.0108                  | 377        | 0.0000     | 0.2687     | 0.2687       |
| butyl hexanoate          | 0.0168                  | 151        | 0.0000     | 0.1388     | 0.1388       |
| ethyl pentanoate         | 0.0004                  | 303        | 0.0000     | 0.0089     | 0.0089       |
| ethyl propanoate         | 0.0135                  | 231        | 0.0000     | 0.1881     | 0.1881       |
| ethyl-2-butenolate       | 0.0022                  | 322        | 0.0000     | 0.0529     | 0.0529       |
| ethyl octanoate          | 0.0001                  | 213        | 0.0000     | 0.0017     | 0.0017       |
| <i>Aldehydes</i>         |                         |            |            |            |              |
| butanal                  | 0.1362                  | 116        | 0.0064     | 0.7854     | 0.7790       |
| decanal                  | 0.0013                  | 155        | 0.0000     | 0.0176     | 0.0176       |
| furfural                 | 0.0014                  | 171        | 0.0000     | 0.0124     | 0.0124       |
| heptanal                 | 0.0007                  | 91         | 0.0000     | 0.0052     | 0.0052       |
| hexanal                  | 0.6609                  | 69         | 0.0394     | 2.2950     | 2.2555       |
| nonanal                  | 0.0048                  | 174        | 0.0013     | 0.0772     | 0.0758       |
| octanal                  | 0.0021                  | 146        | 0.0000     | 0.0287     | 0.0287       |
| pentanal                 | 0.0035                  | 152        | 0.0000     | 0.0368     | 0.0368       |
| t-2-hexenal              | 0.0990                  | 60         | 0.0000     | 0.2931     | 0.2931       |
| 2-methylbutanal          | 0.0012                  | 98         | 0.0000     | 0.0071     | 0.0071       |
| <i>Ketons</i>            |                         |            |            |            |              |
| 3-octanone               | 0.0012                  | 116        | 0.0000     | 0.0064     | 0.0064       |
| 2-butanone               | 0.0035                  | 85         | 0.0000     | 0.0214     | 0.0214       |

|                         |        |     |        |        |        |
|-------------------------|--------|-----|--------|--------|--------|
| 2-heptanone             | 0.0003 | 178 | 0.0000 | 0.0030 | 0.0030 |
| 2-nonanone              | 0.0001 | 264 | 0.0000 | 0.0012 | 0.0012 |
| 2-propanone             | 0.0094 | 61  | 0.0020 | 0.0426 | 0.0406 |
| 6-methyl-5-hepten-2-one | 0.0042 | 82  | 0.0000 | 0.0180 | 0.0180 |
| <i>Terpenes</i>         |        |     |        |        |        |
| $\alpha$ -pinene        | 0.0021 | 457 | 0.0000 | 0.0801 | 0.0801 |
| farnesene               | 0.0277 | 194 | 0.0000 | 0.3968 | 0.3968 |

---

<sup>a</sup>Expressed in arbitrary units a.u.=peak area/internal standard peak area



**Table S3.** Distinct odors and flavors of the 86 juices and numerical evaluation of their sensory attributes.

| #  | Apple cultivar          | Distinct odour                         | Distinct flavour                             | Overall odour | Brown colour | Overall flavour | Apple flavour | Sweet taste | Sour taste |
|----|-------------------------|----------------------------------------|----------------------------------------------|---------------|--------------|-----------------|---------------|-------------|------------|
| 1  | Louisendal              |                                        | subacid fruit/watery                         | 9.8           | 7.1          | 7.1             | 6.8           | 6.1         | 6.7        |
| 2  | Skovfoged               |                                        |                                              | 6.8           | 6.4          | 8.0             | 8.6           | 7.6         | 7.8        |
| 3  | Ferskenrødt sommeræble  | apricot                                | peach                                        | 9.3           | 6.7          | 9.2             | 8.8           | 9.4         | 7.1        |
| 4  | Ejby æble               |                                        | watery                                       | 8.3           | 7.3          | 7.3             | 7.4           | 6.3         | 5.2        |
| 5  | Augustæble              | chemical                               | watery                                       | 7.9           | 8.6          | 6.7             | 7.2           | 7.4         | 5.6        |
| 6  | Uggerløse æble          | berries                                | rhubarb/subacid fruit                        | 6.4           | 0.7          | 8.0             | 7.2           | 7.2         | 9.1        |
| 7  | Herschendsgave          | berries/complex                        | complex/fresh apple/peach                    | 7.9           | 8.3          | 9.5             | 9.5           | 9.8         | 6.6        |
| 8  | Gadeskovæblet           |                                        | sour                                         | 7.0           | 3.7          | 7.3             | 7.7           | 6.7         | 10.1       |
| 9  | Auroravej               | artichoke                              |                                              | 6.8           | 9.6          | 8.4             | 6.9           | 8.3         | 3.5        |
| 10 | Ondrup sommeræble       |                                        | citrus                                       | 6.7           | 0.9          | 9.0             | 8.0           | 9.1         | 8.8        |
| 11 | Fåborgæble              | pineapple/rhubarb/unripe black currant | sour                                         | 9.7           | 2.3          | 8.3             | 7.1           | 7.0         | 11.0       |
| 12 | Kundbyæble              |                                        | insipid/watery                               | 8.4           | 10.7         | 7.5             | 6.9           | 7.7         | 4.6        |
| 13 | Ingers æble             |                                        |                                              | 9.6           | 8.8          | 7.6             | 8.5           | 7.9         | 8.5        |
| 14 | Ørdings æble            |                                        |                                              | 8.6           | 2.2          | 6.8             | 6.8           | 5.2         | 11.6       |
| 15 | Ulderup æble            |                                        |                                              | 8.0           | 6.2          | 8.2             | 8.0           | 8.0         | 7.5        |
| 16 | Thyregod kalvil         |                                        | sour                                         | 5.7           | 7.9          | 8.3             | 8.1           | 7.5         | 8.6        |
| 17 | Fuhræble                | berries/mandarin/peach                 | mandarin/peach                               | 7.9           | 4.2          | 9.0             | 7.4           | 8.2         | 8.6        |
| 18 | Guldspir                |                                        | bitter                                       | 7.7           | 4.0          | 7.8             | 8.0           | 7.2         | 9.2        |
| 19 | Gravenfin               | peach/pear                             | subacid fruit                                | 9.2           | 8.0          | 9.1             | 8.7           | 9.0         | 8.1        |
| 20 | Sofie æble              |                                        | subacid fruit/bitter                         | 7.4           | 6.1          | 8.0             | 8.1           | 7.1         | 9.3        |
| 21 | Nina's æble             |                                        | subacid fruit                                | 8.3           | 5.5          | 9.7             | 9.3           | 8.9         | 8.3        |
| 22 | Søde æbler fra Aalsrode | complex                                |                                              | 9.8           | 10.1         | 8.0             | 6.7           | 7.4         | 2.4        |
| 23 | Vallekilde Sommeræble   |                                        | fresh apple/watery/ bitter                   | 7.2           | 4.1          | 7.8             | 8.3           | 8.2         | 6.3        |
| 24 | Rosenholm               | fresh green                            |                                              | 7.9           | 4.8          | 9.3             | 8.9           | 9.3         | 7.8        |
| 25 | Dynnegårdsæble          | over ripe                              | full-bodied                                  | 8.3           | 7.3          | 9.6             | 8.8           | 8.9         | 7.1        |
| 26 | Nonnetit Bastard        |                                        |                                              | 8.5           | 4.6          | 8.9             | 8.4           | 7.8         | 8.5        |
| 27 | Miang æble              |                                        | watery                                       | 7.6           | 9.0          | 9.4             | 8.8           | 9.1         | 7.1        |
| 28 | Gråsten Gul             |                                        |                                              | 7.8           | 6.7          | 8.4             | 7.7           | 8.7         | 7.3        |
| 29 | Pigeon Stribet          |                                        |                                              | 7.7           | 7.0          | 8.9             | 9.1           | 9.2         | 7.3        |
| 30 | Butteræble              | grapefruit                             | complex fruit/grape fruit                    | 9.5           | 5.8          | 9.6             | 6.9           | 9.3         | 6.5        |
| 31 | Vejlæble                |                                        |                                              | 8.0           | 6.5          | 7.7             | 7.6           | 7.4         | 7.5        |
| 32 | Nybøllegård             |                                        | watery                                       | 8.1           | 5.8          | 8.4             | 8.7           | 7.9         | 6.2        |
| 33 | Fejø æble               |                                        | full-bodied                                  | 7.3           | 5.7          | 10.2            | 9.7           | 9.6         | 8.1        |
| 34 | Hindbæræble             |                                        | subacid fruit/ bitter                        | 9.0           | 7.2          | 8.3             | 8.5           | 8.2         | 7.9        |
| 35 | Pilehavesæble           |                                        | citrus/sour                                  | 6.4           | 0.9          | 8.8             | 7.8           | 8.3         | 10.0       |
| 36 | Langt rødt Hinbæræble   |                                        | bitter                                       | 8.6           | 7.1          | 9.2             | 8.9           | 9.4         | 6.3        |
| 37 | Mosedede æbler          |                                        |                                              | 7.7           | 7.0          | 6.9             | 7.0           | 7.2         | 5.8        |
| 38 | Ingrid Marie            |                                        |                                              | 8.6           | 3.9          | 8.0             | 8.2           | 8.0         | 7.5        |
| 39 | Maglemer rød            |                                        |                                              | 5.1           | 4.2          | 7.2             | 6.7           | 7.4         | 6.3        |
| 40 | Fynsk udvalg V          |                                        | watery                                       | 9.3           | 5.7          | 6.8             | 7.0           | 7.0         | 7.5        |
| 41 | Lundbytorp æble         |                                        | full-bodied                                  | 8.5           | 10           | 10.3            | 10.1          | 10.3        | 5.7        |
| 42 | Bodil Neergård          |                                        | subacid fruit                                | 8.2           | 4.8          | 9.1             | 9.2           | 9.5         | 7.7        |
| 43 | Filippa Harritslev      | fresh green/pineapple                  | complex/fresh apple                          | 10.1          | 2.8          | 10.4            | 9.8           | 10          | 7.2        |
| 44 | Tønnes                  |                                        |                                              | 7.8           | 5.8          | 8.1             | 7.5           | 10.2        | 5.7        |
| 45 | Flaskehalsler           | sharp                                  |                                              | 8.8           | 8.3          | 9.5             | 9.8           | 9.5         | 7.7        |
| 46 | Flintinge               |                                        | complex                                      | 9.1           | 3.6          | 10              | 9.4           | 9.2         | 8.4        |
| 47 | Jakober                 |                                        |                                              | 8.9           | 5.9          | 7.8             | 7.9           | 7.4         | 9.2        |
| 48 | Æbletoftæble            |                                        |                                              | 6.8           | 4.2          | 8.0             | 7.2           | 8.9         | 6.5        |
| 49 | Skenkelsø æble          |                                        | sour                                         | 7.6           | 7.0          | 9.4             | 9.3           | 8.5         | 9.0        |
| 50 | Broholm Rosenæble       | complex                                | insipid/bitter                               | 7.8           | 5.6          | 8.7             | 8.4           | 8.7         | 7.0        |
| 51 | Ondrup moseæble         |                                        |                                              | 8.0           | 6.5          | 7.4             | 7.3           | 7.2         | 7.0        |
| 52 | Høje Taastrup æble      |                                        |                                              | 8.0           | 6.4          | 7.5             | 7.4           | 7.3         | 7.1        |
| 53 | Knud Lunn               | peach                                  | subacid fruit/watery                         | 5.6           | 7.0          | 8.4             | 7.9           | 7.2         | 8.7        |
| 54 | Niels Juul              |                                        |                                              | 9.8           | 7.2          | 9.3             | 9.4           | 9.8         | 5.6        |
| 55 | Thyrislund              |                                        |                                              | 5.1           | 7.0          | 7.4             | 7.6           | 8.4         | 6.9        |
| 56 | Broholm                 |                                        | fresh apple/red berries/subacid fruit/bitter | 8.8           | 3.8          | 9.6             | 9.6           | 9.6         | 6.7        |
| 57 | Skensved æble           |                                        | watery                                       | 7.6           | 9.1          | 5.5             | 6.6           | 6.0         | 4.8        |
| 58 | Pigeon spejlsby         |                                        | bitter                                       | 8.5           | 8.4          | 8.6             | 8.0           | 9.1         | 6.5        |
| 59 | Borgherre               | weak                                   | citrus/fresh apple/pear                      | 6.4           | 1.8          | 10.2            | 8.6           | 9.5         | 7.6        |
| 60 | Mathilde æble           | peach                                  |                                              | 9.5           | 7.3          | 8.9             | 8.7           | 9.2         | 6.7        |
| 61 | Jølbyæble               |                                        |                                              | 8.0           | 6.5          | 7.7             | 7.6           | 7.3         | 7.4        |
| 62 | Gråsten Rød             |                                        |                                              | 8.5           | 6.1          | 8.8             | 7.5           | 8.4         | 5.6        |
| 63 | Holstenhus              |                                        | bitter                                       | 5.0           | 4.8          | 8.5             | 8.7           | 10.3        | 8.0        |
| 64 | Nonnetit fra Als        | chemical/pear                          | chemical/fresh apple                         | 8.6           | 4.3          | 9.6             | 8.5           | 9.0         | 6.8        |
| 65 | Pigeon Rød Vinter       | strawberry                             | strawberry/bitter                            | 6.2           | 8.8          | 9.1             | 8.9           | 8.4         | 8.1        |
| 66 | Pigeon fra Maribo       |                                        |                                              | 9.3           | 8.2          | 9.1             | 9.1           | 8.8         | 8.7        |
| 67 | Alsisk Citronæble       | pineapple/rhubarb/Tea                  | pear/pineapple/tea                           | 8.6           | 6.5          | 8.8             | 8.0           | 8.3         | 6.8        |
| 68 | Antonius                | peach                                  | tropical fruit                               | 8.6           | 9.2          | 10.4            | 10.0          | 10.4        | 6.9        |
| 69 | Fynsk udvalg II         |                                        | apricot                                      | 7.4           | 7.4          | 9.4             | 8.9           | 8.3         | 8.0        |
| 70 | Annas æble              |                                        | pineapple                                    | 5.9           | 8.5          | 5.3             | 6.2           | 7.5         | 7.7        |
| 71 | Bedstefars æble         | fresh green                            | fresh apple                                  | 9.3           | 6.3          | 9.6             | 9.9           | 9.1         | 7.7        |
| 72 | Elstar                  |                                        |                                              | 8.1           | 5.9          | 8.5             | 8.2           | 8.4         | 7.0        |
| 73 | Arreskov                |                                        | watery                                       | 8.7           | 5.5          | 7.2             | 7.8           | 7.9         | 5.4        |

|    |                       |                        |                             |      |     |      |      |      |     |
|----|-----------------------|------------------------|-----------------------------|------|-----|------|------|------|-----|
| 74 | Grästen Høvdinggård   |                        |                             | 7.4  | 3.6 | 4.9  | 6.6  | 6.9  | 6.2 |
| 75 | Barritskov madaeble   | weak                   | complex/pineapple           | 8.7  | 1.2 | 9.1  | 8.1  | 9.0  | 7.8 |
| 76 | Grämølles æble        |                        | red berries/bitter          | 7.1  | 4.9 | 9.3  | 8.4  | 7.7  | 7.5 |
| 77 | Farum æble            | pear                   | pear/watery/bitter          | 7.4  | 6.6 | 7.8  | 7.0  | 6.7  | 9.4 |
| 78 | Ildrød Pigeon         | complex                | bitter/subacid fruit/bitter | 8.1  | 7.5 | 7.8  | 7.9  | 7.7  | 7.9 |
| 79 | Dronning Louise       | pear                   | full-bodied                 | 10.1 | 9.5 | 10.2 | 10.0 | 10.0 | 6.3 |
| 80 | Risskov Rambour       |                        | watery                      | 8.3  | 7.9 | 8.4  | 9.0  | 7.7  | 8.9 |
| 81 | Tagesminde æble       |                        | sour/watery                 | 6.3  | 2.8 | 7.7  | 7.6  | 7.2  | 9.3 |
| 82 | Apple 207 Knuthenborg | pear                   |                             | 7.4  | 6.2 | 8.6  | 8.8  | 8.9  | 6.9 |
| 83 | Mormors æble          | apricot/sweetish fruit | apricot/complex/peach       | 7.6  | 6.3 | 10.0 | 9.7  | 9.8  | 5.6 |
| 84 | Mølleskov             | over ripe              | watery                      | 8.7  | 4.7 | 9.8  | 8.6  | 9.2  | 7.6 |
| 85 | Herfølge voksæble     | fresh green            | citrus                      | 6.3  | 2.9 | 8.5  | 7.6  | 6.1  | 9.6 |
| 86 | Lise Legind           |                        | peach/strawberry/watery     | 8.7  | 6.3 | 8.3  | 8.5  | 8.4  | 6.4 |

**Table S4.** Average concentrations of the compounds and parameters identified from Bruker SGF profiling.

|                                    | units              | LOQ <sup>a</sup> | mean  | SD <sup>b</sup> | %CV <sup>c</sup> | min               | max   | range | A.I.J.N. (Apple) |      |
|------------------------------------|--------------------|------------------|-------|-----------------|------------------|-------------------|-------|-------|------------------|------|
|                                    |                    |                  |       |                 |                  |                   |       |       | min              | max  |
| <b>Sugars</b>                      |                    |                  |       |                 |                  |                   |       |       |                  |      |
| Sucrose                            | g L <sup>-1</sup>  | 0.2              | 31.8  | 11.9            | 37.5             | 7.5               | 66.8  | 59.3  | 5.0              | 30.0 |
| Glucose                            | g L <sup>-1</sup>  | 0.5              | 12.3  | 3.8             | 31               | 5.6               | 21.1  | 15.5  | 15.0             | 35.0 |
| Fructose                           | g L <sup>-1</sup>  | 0.5              | 51.3  | 7.9             | 15               | 28.9              | 67.9  | 38.9  | 45.0             | 85.0 |
| Xylose                             | mg L <sup>-1</sup> | 300              | 421.7 | 162.8           | 38.6             | N.D. <sup>c</sup> | 863   | -     | -                | -    |
| <b>Acids</b>                       |                    |                  |       |                 |                  |                   |       |       |                  |      |
| Malic                              | g L <sup>-1</sup>  | 0.5              | 9.7   | 2.5             | 25.2             | 2.5               | 18.9  | 16.4  | 3.0              | -    |
| Cholorogenic                       | mg L <sup>-1</sup> | 20               | 37.1  | 60.2            | 162              | N.D.              | 377   | -     | -                | -    |
| Succinic                           | mg L <sup>-1</sup> | 10               | 6.9   | 10.3            | 147.7            | N.D.              | 41    | -     | -                | -    |
| Citramalic                         | mg L <sup>-1</sup> | 10               | 13.4  | 15.4            | 115              | N.D.              | 71    | -     | -                | -    |
| Quinic                             | mg L <sup>-1</sup> | 50               | 573.1 | 349.4           | 61               | 151.0             | 2520  | 2369  | -                | -    |
| <b>Quality indicators</b>          |                    |                  |       |                 |                  |                   |       |       |                  |      |
| Acetaldehyde ( <i>n</i> =1) *      | mg L <sup>-1</sup> | 5                | -     | -               | -                | -                 | 8     | -     | -                | -    |
| Alanine ( <i>n</i> =69) *          | mg L <sup>-1</sup> | 5                | 19.7  | 15.8            | 80               | 5.0               | 73.0  | 68    | 1                | 50   |
| Ethanol ( <i>n</i> =34) *          | mg L <sup>-1</sup> | 10               | 88.0  | 92.0            | 105              | 10                | 371   | 361   | -                | 3000 |
| Galacturonic acid ( <i>n</i> =2) * | mg L <sup>-1</sup> | 100              | 136.5 | 12.0            | 8.8              | 128               | 145   | 17    | -                | -    |
| Methanol ( <i>n</i> =21) *         | mg L <sup>-1</sup> | 10               | 16.9  | 8.9             | 52.6             | 10.0              | 47.0  | 37    | -                | -    |
| Lactic acid                        | mg L <sup>-1</sup> | 10               | -     | -               | -                | -                 | -     | -     | -                | 500  |
| Acetoine                           | mg L <sup>-1</sup> | 10               | -     | -               | -                | -                 | -     | -     | -                | -    |
| Arbutin                            | mg L <sup>-1</sup> | 10               | -     | -               | -                | -                 | -     | -     | -                | -    |
| Benzaldehyde                       | mg L <sup>-1</sup> | 5                | -     | -               | -                | -                 | -     | -     | -                | -    |
| Citric acid                        | mg L <sup>-1</sup> | 0.5              | -     | -               | -                | -                 | -     | -     | -                | 0.1  |
| Benzoic acid                       | mg L <sup>-1</sup> | 10               | -     | -               | -                | -                 | -     | -     | -                | -    |
| Formic acid                        | mg L <sup>-1</sup> | 5                | -     | -               | -                | -                 | -     | -     | -                | -    |
| Fumaric acid                       | mg L <sup>-1</sup> | 5                | -     | -               | -                | -                 | -     | -     | -                | 5    |
| Proline                            | mg L <sup>-1</sup> | 50               | -     | -               | -                | -                 | -     | -     | -                | -    |
| Pyruvic acid                       | mg L <sup>-1</sup> | 10               | -     | -               | -                | -                 | -     | -     | -                | -    |
| Sorbic acid                        | mg L <sup>-1</sup> | 10               | -     | -               | -                | -                 | -     | -     | -                | -    |
| 5-hydroxymethylfurfural            | mg L <sup>-1</sup> | 5                | -     | -               | -                | -                 | -     | -     | -                | 20   |
| <b>Ratios</b>                      |                    |                  |       |                 |                  |                   |       |       |                  |      |
| Malic/quinic                       |                    |                  | 21.3  | 11.0            | 51.8             | 5.1               | 68.3  | 63.2  | -                | -    |
| Glucose/Fructose                   |                    |                  | 0.24  | 0.065           | 27.3             | 0.10              | 0.42  | 0.32  | 0.30             | 0.50 |
| Total sugar                        | g L <sup>-1</sup>  | 2                | 95.4  | 12.0            | 12.5             | 62.5              | 126.1 | 63.6  | -                | -    |

<sup>a</sup>LOQ = Limit of Quantification.<sup>b</sup>SD = Standard Deviation.<sup>c</sup>%CV = percent Coefficient of Variation calculated as (SD/mean) \*100<sup>d</sup>N.D. = Not Detectable.\* The statistical parameters have been calculated on the *n* indicated in brackets. The remaining samples showed concentrations below the LOQ.

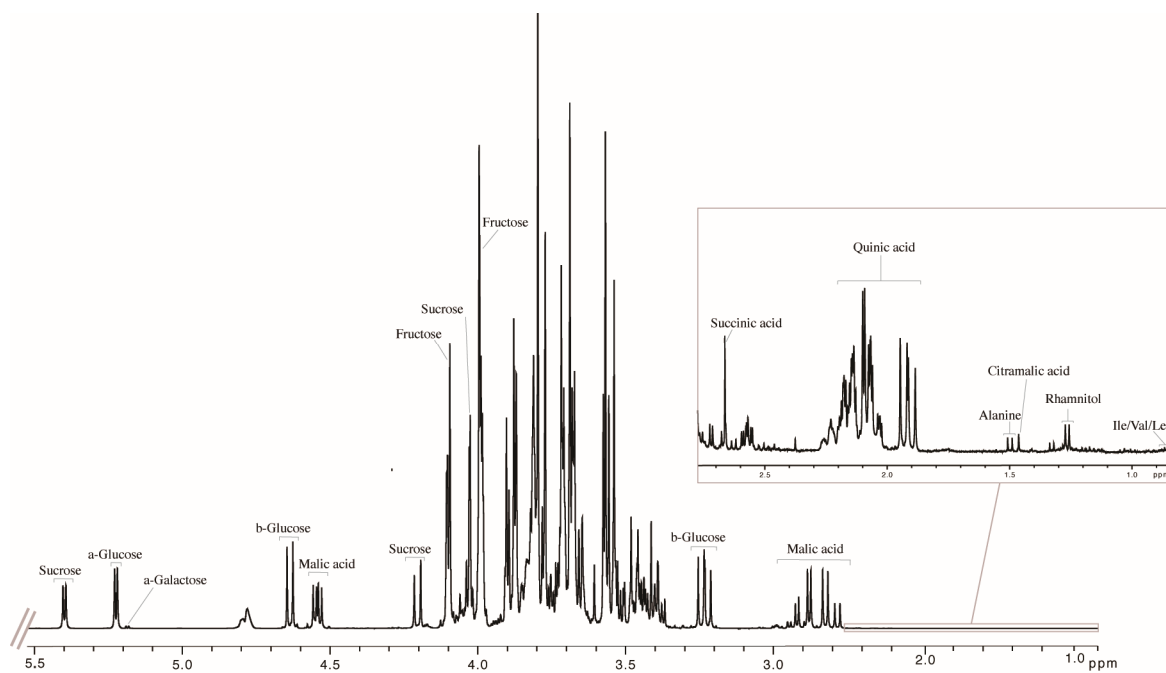

**Figure S1.** Signal assignment of a representative  $^1\text{H}$ -NMR spectrum of apple juice (0 – 5.5 ppm).
